# Supplementary material for: Pathogenicity Induced by Invasive Infection of Streptococcus dysgalactiae subsp. equisimilis in a Mouse Model of Diabetes
Source: Front Microbiol. 2018 Sep 21;9:2128. doi: 10.3389/fmicb.2018.02128 (PMC6160533; doi:10.3389/fmicb.2018.02128)
Supplement: TABLE S4 — Genes increased by SDSE-167 injection specifically in db/db mice. [file Table_4.XLSX]

## Sheet: db167specifc_meta_1325genes.csv
	db/db SDSE167		m+/db SDSE167		db/db SA		m+/db SA
Gene ID	Log(Fold Change)	p-value (FDR)	Log(Fold Change)	p-value (FDR)	Log(Fold Change)	p-value (FDR)	Log(Fold Change)	p-value (FDR)
Ptgs2	6.80931	1e-06	1.43586	0.12347	-1.16756	0.926784	1.11567	0.806801
Il1b	4.54968	1e-06	1.4495	0.0502371	1.16499	0.839909	1.3132	0.270654
Fgf23	4.40782	1e-06	1.34196	0.0662849	1.02843	0.999785	1.06254	0.855414
Il6	3.78843	5.284e-05	1.18993	0.860605	-1.04581	0.999785	-1.08826	0.942813
Nos2	3.76343	1e-06	1.39594	0.0597966	-1.08707	0.999785	-1.06757	0.8662
Gbp3	3.6668	1e-06	-1.00742	0.982989	-1.07001	0.999785	-1.10701	0.71277
Ctla2a	3.39123	1.276e-06	1.44028	0.231095	2.02013	0.0535343	1.10105	0.866186
Tmem154	3.34651	1e-06	1.5666	0.178256	1.25939	0.87167	1.25313	0.667698
Clec4e	3.1417	1e-06	1.35567	0.521533	-1.02197	0.999785	1.6031	0.259905
Car13	2.8849	1e-06	1.42047	0.189399	-1.07287	0.999785	1.34175	0.375688
Aldh1a3	2.83657	1e-06	1.40237	0.0769446	1.21852	0.644191	1.36917	0.156152
Rgs1	2.82573	1e-06	1.5571	0.0653905	1.0281	0.999785	-1.04665	0.934547
Creb3l1	2.79511	1e-06	1.27638	0.102719	-1.13042	0.815829	-1.06726	0.826798
Vcan	2.78052	1e-06	1.46164	0.166903	1.00486	0.999785	1.29049	0.501264
Bcl6b	2.61271	1e-06	1.25161	0.276049	1.30782	0.232319	1.0657	0.862106
Pf4	2.55302	1e-06	1.38258	0.0680217	1.06867	0.999785	-1.01667	0.968531
Ccrl2	2.47677	1e-06	1.13629	0.619896	1.33774	0.272355	-1.08623	0.813225
Trem1	2.41055	1.501e-05	1.6656	0.0604617	-1.00815	0.999785	1.36652	0.429763
Itsn1	2.388	1e-06	1.09374	0.538931	1.0884	0.85516	-1.06779	0.728991
Trim6	2.36882	1.818e-06	1.48122	0.10571	1.22139	0.825031	1.21188	0.619137
Kcnj2	2.35247	0.0001157	1.11196	0.858321	-1.03576	0.999785	1.0998	0.880616
Tnfrsf22	2.32819	1e-06	1.10408	0.637099	1.0078	0.999785	1.07251	0.787692
Dab2	2.30489	1e-06	1.05253	0.619896	1.01256	0.999785	-1.04225	0.742363
Clec4d	2.2491	3.358e-06	1.54259	0.0911516	-1.00147	0.999785	1.56284	0.11183
9530077C05Rik	2.24799	4.776e-06	1.47427	0.142273	1.0907	0.999785	1.16819	0.731759
Gls	2.1997	1e-06	1.09034	0.765502	-1.0234	0.999785	-1.14426	0.645947
Mmp12	2.19387	1e-06	1.14535	0.741755	1.08202	0.999785	1.29791	0.447646
Plaur	2.17344	1e-06	1.40962	0.0533329	1.02322	0.999785	1.14167	0.66518
Steap1	2.17111	0.004112	1.36955	0.481375	-1.11217	0.999785	-1.01686	0.984749
Fam26f	2.13026	1.158e-05	1.33718	0.255907	-1.01585	0.999785	1.10909	0.815106
Rhoc	2.11765	1e-06	1.19857	0.0646196	-1.21978	0.135258	-1.14785	0.313278
Nfyb	2.10975	1e-06	-1.20447	0.0596006	1.00113	0.999785	-1.13245	0.328815
Rpl12	2.10717	1e-06	1.16078	0.495206	1.22457	0.451761	1.02794	0.937096
2010109K11Rik	2.07618	1e-06	1.32911	0.124078	1.12653	0.934063	-1.13154	0.706721
Rnf113a2	2.06606	1e-06	1.29103	0.170902	1.27056	0.424517	1.03286	0.931489
Npat	2.03677	1e-06	1.18985	0.17849	1.27483	0.166239	-1.23614	0.167415
Cxcl5	2.03559	0.003646	1.34419	0.469621	1.1123	0.999785	1.26556	0.64259
Rpap3	2.01667	7.243e-06	1.3729	0.0755428	1.35599	0.265035	1.28916	0.255341
Rell1	2.01371	1e-06	-1.07528	0.599926	1.06909	0.954318	-1.15326	0.234836
Utp18	2.01287	1e-06	1.10138	0.639575	1.09393	0.949463	-1.00869	0.979154
Satb2	2.00831	2.617e-06	1.29883	0.155104	1.40032	0.143392	1.00255	0.995013
Parp14	2.00787	1e-06	1.06042	0.61768	1.23342	0.0528085	-1.03041	0.852069
Map4k4	2.00379	1e-06	1.26171	0.0961726	-1.0491	0.999785	1.04477	0.879028
Nol10	2.00355	1e-06	1.33636	0.0686391	1.23885	0.439652	-1.05105	0.885646
