# Supplementary material for: Pathogenicity Induced by Invasive Infection of Streptococcus dysgalactiae subsp. equisimilis in a Mouse Model of Diabetes
Source: Front Microbiol. 2018 Sep 21;9:2128. doi: 10.3389/fmicb.2018.02128 (PMC6160533; doi:10.3389/fmicb.2018.02128)
Supplement: TABLE S5 — Genes decreased by SDSE-167 injection specifically in db/db mice. [file Table_5.XLSX]

## Sheet: db167specifc_meta_1325genes.csv
	db/db SDSE167		m+/db SDSE167		db/db SA		m+/db SA
Gene ID	Log(Fold Change)	p-value (FDR)	Log(Fold Change)	p-value (FDR)	Log(Fold Change)	p-value (FDR)	Log(Fold Change)	p-value (FDR)
Gm4794	-2.99404	1e-06	1.33225	0.769978	1.1576	0.175807	1.2985	0.813677
1600002H07Rik	-2.81127	1e-06	-1.14968	0.107457	-1.15891	0.104693	1.0056	0.975841
Arhgef19	-2.72646	1e-06	-1.27389	0.0981292	-1.1833	0.244435	1.017	0.954085
Mtnr1a	-2.7168	1e-06	-1.31108	0.282798	-1.01087	0.999785	-1.38949	0.220737
Ptprb	-2.63546	1e-06	-1.0618	0.368383	-1.03225	0.965591	-1.00134	0.991749
Sdpr	-2.45535	1e-06	-1.29064	0.146913	-1.24294	0.267001	-1.27897	0.220417
4732463B04Rik	-2.41271	1e-06	-1.33083	0.141057	1.18475	0.279792	1.14014	0.609301
Smpd3	-2.37781	1e-06	-1.03464	0.935568	-1.20703	0.364145	1.33952	0.168943
Dnajc28	-2.36223	1e-06	-1.31431	0.0508837	1.05096	0.999785	1.02904	0.915064
Zmat1	-2.35728	1e-06	-1.41784	0.0840812	-1.3887	0.0565525	1.02466	0.950501
Arhgef9	-2.3403	1e-06	-1.48898	0.0604153	-1.2488	0.272998	-1.37318	0.20842
Trim7	-2.29565	1e-06	-1.15531	0.540034	-1.23848	0.271144	-1.05808	0.865257
A1bg	-2.24777	2.289e-06	1.19993	0.680024	-1.03121	0.999785	1.27702	0.567482
4931406H21Rik	-2.24276	1e-06	1.00905	0.979511	-1.1546	0.663874	1.08718	0.779295
Tmem20	-2.227	1e-06	-1.10703	0.137047	-1.12826	0.118144	-1.09993	0.228464
Sec16b	-2.20311	1e-06	-1.09597	0.162309	-1.06945	0.50774	-1.02357	0.841867
Wdr76	-2.17236	9.247e-06	-1.31568	0.18479	-1.38657	0.133323	-1.02676	0.944953
Stard8	-2.13941	1e-06	-1.15534	0.346391	-1.13385	0.703073	-1.1291	0.506879
Fam131c	-2.0853	1e-06	-1.16163	0.40058	-1.24179	0.0799314	1.23756	0.161341
Them4	-2.07239	1e-06	-1.17802	0.0711324	-1.14506	0.292412	-1.11065	0.38046
1810022C23Rik	-2.05025	6.969e-06	-1.10214	0.827999	-1.41603	0.0643306	1.01037	0.985897
Gm6597	-2.01596	0.0286952	-1.24228	0.642205	-1.84207	0.112531	-1.03941	0.953151
Ppil6	-2.01536	0.0329387	-1.47184	0.31733	-1.11236	0.999785	-1.19257	0.745209
